# Supplementary material for: Human α-Defensin 51–9 and Human β-Defensin 2 Improve Metabolic Parameters and Gut Barrier Function in Mice Fed a Western-Style Diet
Source: MDPI journal article supplement (doi:10.3390/ijms241813878), 2023-09-09
Supplement: s1 [file s1]

## Supplements

Table S1. Primers are used in quantitative real-time PCR.

| Primer        | Forward (5'-3')             | Reverse (5'-3')            |
|---------------|-----------------------------|----------------------------|
| Actb          | GCTGAGAGGGAAATCGTGCGTG      | CCAGGGAGGAAGAGGATGCGG      |
| Pan-cryptidin | AAGAGACTAAAACTGAGGAGCAGC    | GGTGATCATCAGACCCCAGCATCAGT |
| Defa1         | TCAAGAGGCTGCAAAGGAAGAGAAC   | TGGTCTCCATGTTTACGCGACAGC   |
| Defa5         | TCAAAAAAGCTGATATGCTATTG     | AGCTGCAGCAGAATACGAAAG      |
| Defa21        | CCAGGGGAAGATGACCAGGCT       | TGCAGCGACGATTTCTACAAAGGC   |
| Lyz1          | GCCAAGGTCTACAATCGTTGTGAGTTG | CAGTCAGCCAGCTTGACACCACG    |
| Reg3g         | TTCCTGTCCTCCATGATCAAAA      | CATCCACCTCTGTTGGGTTCA      |
| Mmp7          | TTCAAGAGGGTTAGTTGGGGGACTG   | CCGCCTCTACGAGTGAAACTGTT    |
| Wnt3          | TGGAAGTGTACCACCATAGATGAC    | GTAGCGGAGCCGACCACA         |
| Wnt5a         | ATGGTGTGTCTGGCTCCTG         | CAGTGGCTTCATTGGTAGTGCT     |
| Wnt9a         | GCAGGACTTTCTCAAGGACA        | CCCTGCCAAAGACAGAAGTA       |
| LRP6          | TGGTGGCTTGTGGTGCTG          | CAATGGCGATGCGAACTG         |
| Tcf1          | CCAGGACTCACCTCGTA           | TTCTGTGCCTAGCAACCAA        |
| Tcf4          | CTGGTCTGCACGGGATAA          | TGTGACTTGGCGTCTTGG         |
| Muc1          | TCCTTCTGAGAGCCACCACT        | GGTGACCACTTCTGCCAACT       |
| Muc2          | GATGGCACCTACCTCGTTGT        | GTCCTGGCACTTGTGGAAT        |
| Cldn2         | GTCATCGCCCATCAGAAGAT        | ACTGTTGGACAGGGAACCAG       |
| Cldn5         | GCTCTCAGAGTCCGTTGACC        | CTGCCCTTTCAGGTTAGCAG       |
| Cldn7         | GCGACAACATCATCACAGCC        | CCTTGGAGGAATTGGACTTGG      |
| Ocln          | ACTCCTCCAATGGACAAGTG        | CCCCACCTGTCGTGTAGTCT       |
| ZO-1          | CCACCTCTGTCCAGCTCTTC        | CACCGGAGTGATGGTTTTCT       |

Abbreviation: Actb,  $\beta$ -Actin; pan-cryptidin, pancryptidin; Defa1, cryptidin 1; Defa5,  $\alpha$ -defensin 5; Defa21, cryptidin 4; Lyz1, lysozyme; Reg3g, regenerating islet-derived protein 3 gamma; Mmp7, matrix metalloproteinase-7; Wnt, wingless and Int; LRP6, low-density-lipoprotein receptor related protein 6; Tcf, T cell-specific transcription factor; Muc, Mucin; Cldn, Claudin; Ocln, Occludin, ZO-1, zonula occludens 1.

Figure S1:

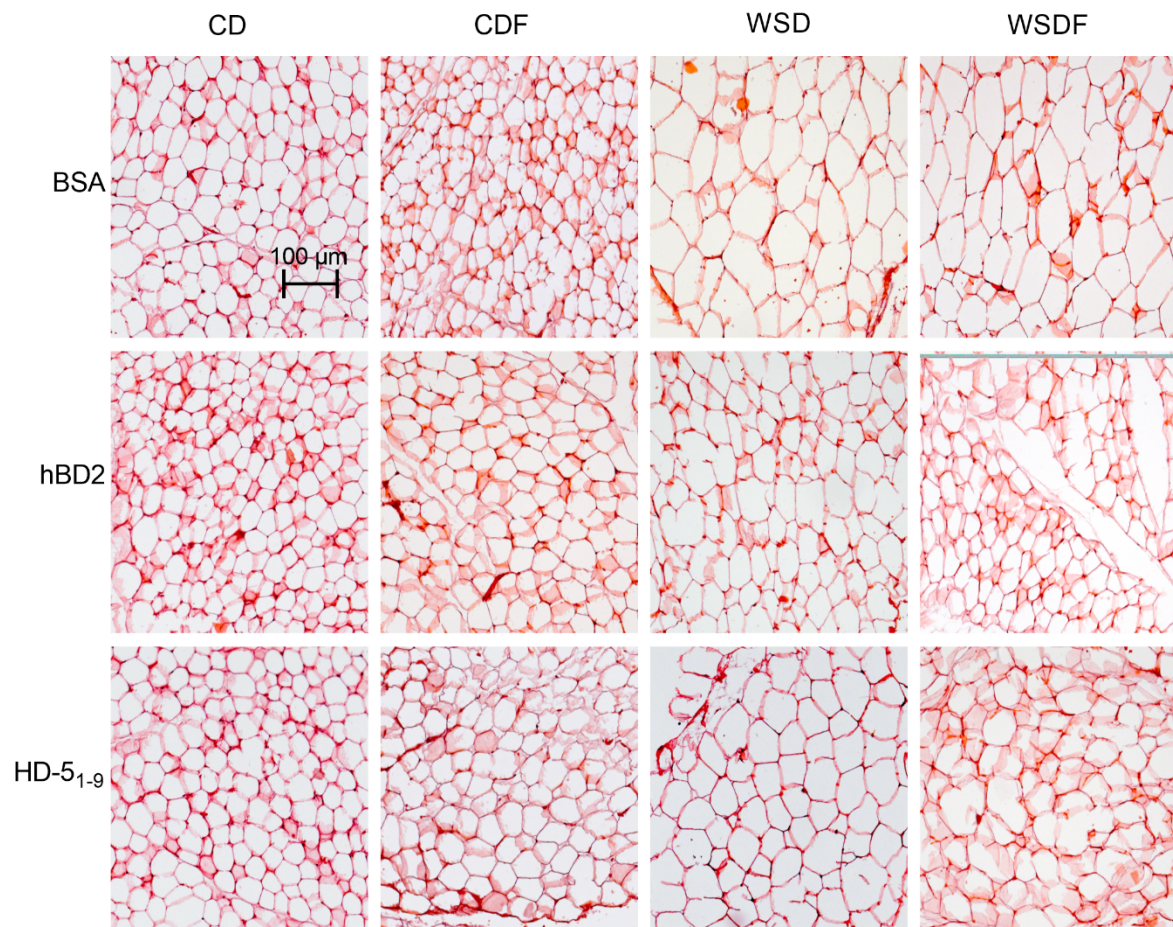

Figure S1. HD5<sub>1-9</sub> and hBD2 reduced mesenteric fat cell area and fat cell size in mice fed a WSD $\pm$ F. Representative images of HE staining in mesenteric fat tissue. Scale bar: 100  $\mu\text{m}$  (n = 6-7). Abbreviations: CD, control diet; F, fructose; HD5, human  $\alpha$ -defensin 5; hBD2, human  $\beta$ -defensin 2; WSD, Western-Style diet.

Figure S2

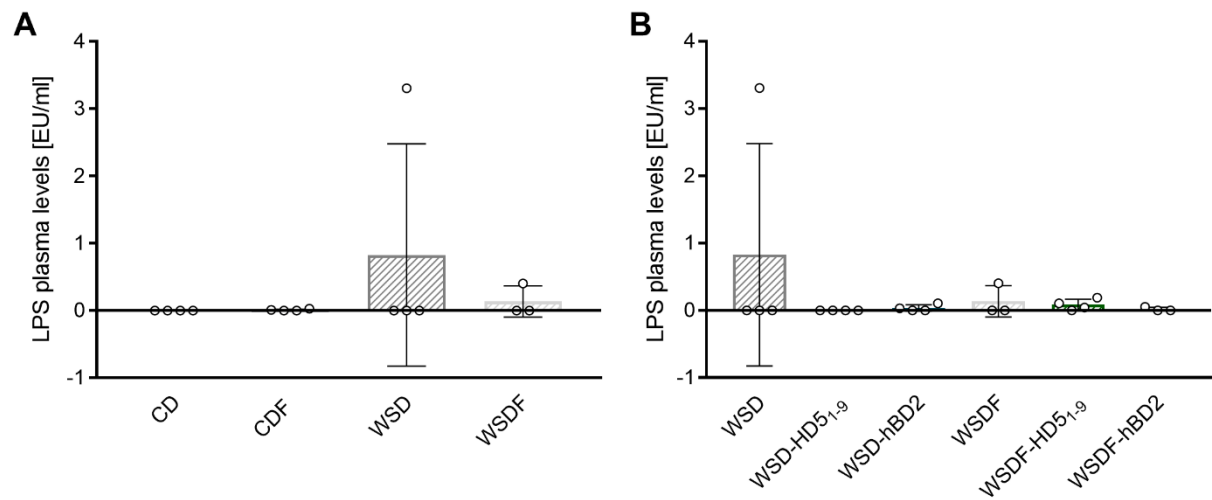

Figure S2. Endotoxemia in the portal vein plasma was unaffected by diets and defensin treatments. LPS plasma levels in EU/ml in the diet groups (A), LPS plasma levels in EU/ml in the intervention groups (B). Data are presented as means  $\pm$  standard error of the mean (SEM) ( $n = 6-7$ ). Statistical analysis was performed by Kruskal-Wallis-test with Dunn's test. Abbreviations: CD, control diet; F, fructose; EU, endotoxin units; HD5, human  $\alpha$ -defensin 5; hBD2, human  $\beta$ -defensin 2; WSD, Western-Style diet.

Figure S3:

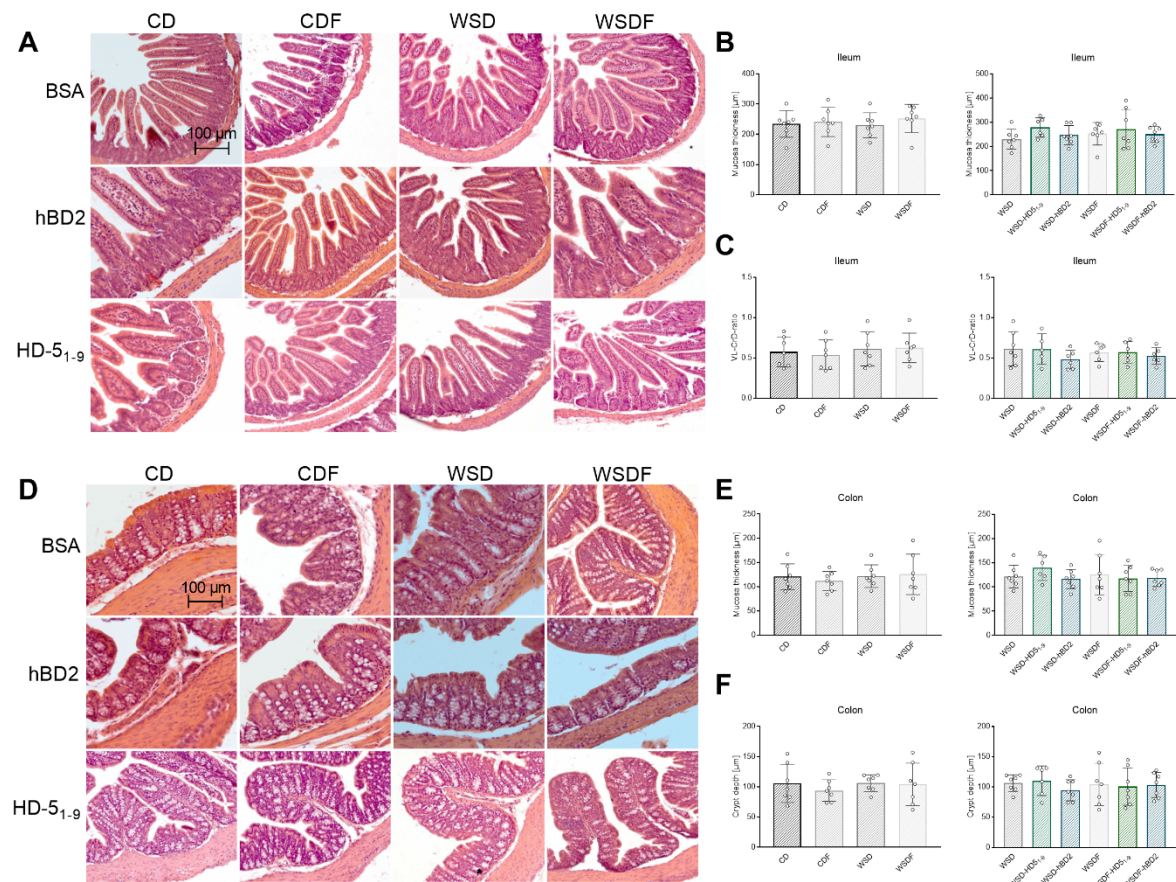

Figure S3. Intestinal crypt depth and villus length remained unchanged. Representative images of HE staining in ileal and colonic tissue. Scale bar: 100 μm (A, D). Quantification of mucosa thickness (B), ratio of villus length to crypt depth (C) in the ileum, as well as mucosa thickness (E) and depth of the crypts (F) in the colon (G). Data are presented as means  $\pm$  standard error of the mean (n = 6-7). Statistical analysis was performed by one-way ANOVA with Dunnett's post-test. Abbreviations: CD, control diet; F, fructose; HD5, human  $\alpha$ -defensin 5; hBD2, human  $\beta$ -defensin 2; VL-CrD-ratio, ratio of villus length to crypt depth; WSD, Western-Style diet.

Figure S4:

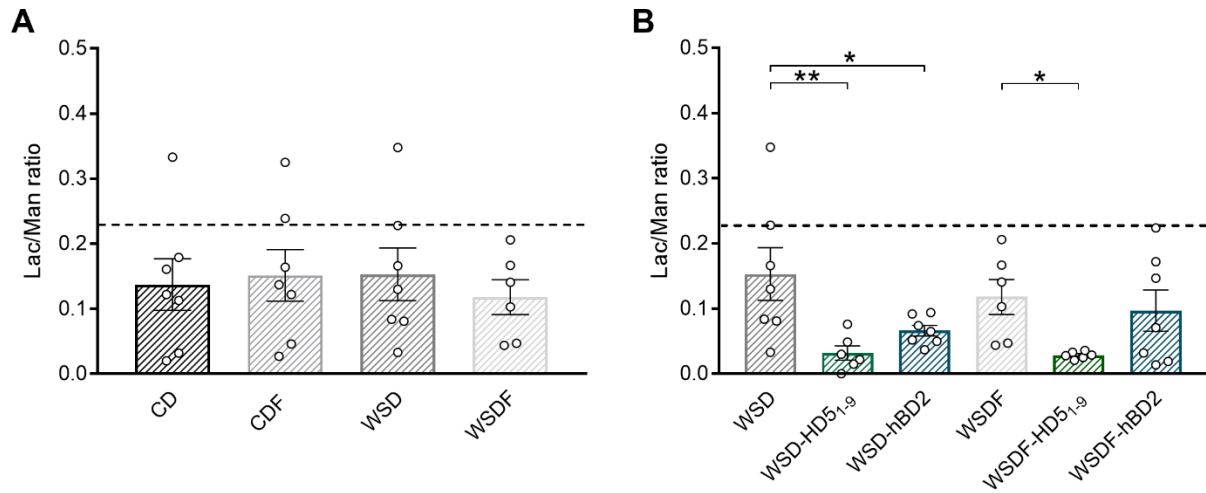

Figure S4. Diets did not affect intestinal permeability, but HD5<sub>1-9</sub> and hBD2 treatment improved gut barrier integrity. Intestinal permeability was determined by Lac/Man ratio in 18 h urine samples ( $n=6-7$ ) in the diet groups (A) and the intervention groups (B). Data are presented as means  $\pm$  standard error of the mean ( $n = 6-7$ ). Statistical analysis was performed by one-way ANOVA with Dunnett's post-test. Significant differences are indicated: \*  $p$ -value < 0.05, \*\*  $p$ -value < 0.01. Abbreviations: CD, control diet; F, fructose; HD5, human  $\alpha$ -defensin 5; hBD2, human  $\beta$ -defensin 2; Lac; lactulose; Man, mannitol; WSD, Western-Style diet.

Figure S5:

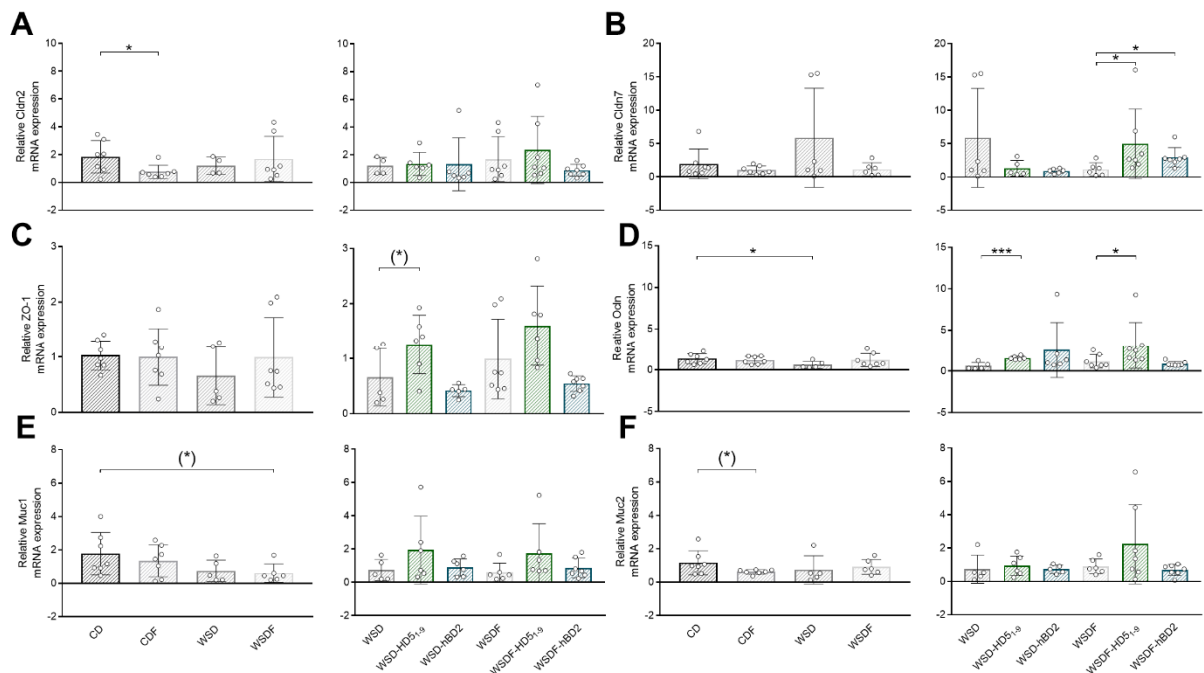

Figure S5. Antimicrobial peptide treatment regulates intestinal barrier function in the colon. mRNA expression levels of cldn2 (A), cldn7 (B), ZO-1 (C), ocln (D), Muc1 (E), Muc2 (F) in colon of mice after 18-week feeding period are shown. Data are presented as means  $\pm$  standard error of the mean ( $n = 6-7$ ). Statistical analysis was performed by Kruskal-Wallis-test with Dunn's test. Significant differences are indicated: \*  $p$ -value  $< 0.05$ ; \*\*\*  $p$ -value  $< 0.001$ .  $p$ -values ranged between  $> 0.05$  and  $< 0.1$  were considered as trend. Abbreviations: cldn, claudin; Muc, mucin; ocln, occludin; ZO-1, zonula occludens 1; for other abbreviations, see Figure 1.

Figure S6:

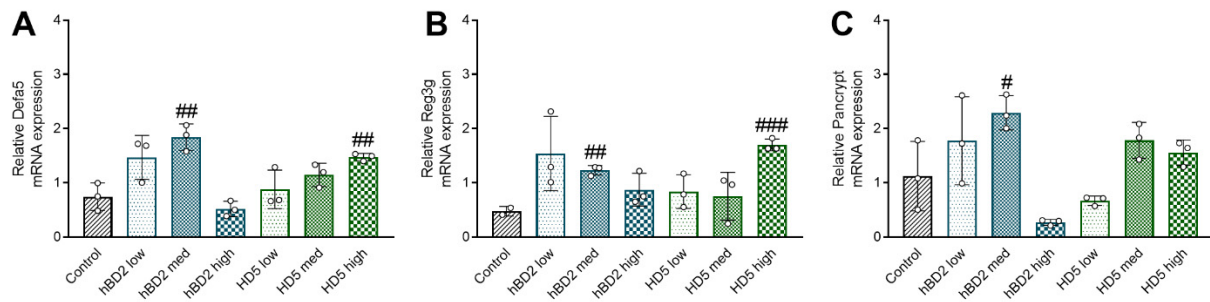

Figure S6. To induce  $\alpha$ -Defensins in organoids *in vitro*, 36 ng/ $\mu$ L of hBD2 and 360 ng/ $\mu$ L of HD5<sub>1-9</sub> were most effective. Organoids were treated with HD5<sub>1-9</sub> (3.6 ng/ $\mu$ L, 36 ng/ $\mu$ L, 360 ng/ $\mu$ L) or hBD2 (3.6 ng/ $\mu$ L, 36 ng/ $\mu$ L, 360 ng/ $\mu$ L) for 30h. mRNA expression levels of Defa5 (A), Reg3g (B), and pan-cryptidin (C) determined by quantitative RT-PCR derived in organoids from the small intestine of healthy C57BL/6 mice (n=3). Statistical analysis was performed by unpaired t-test. Significant differences are indicated as # p-value < 0.05; ## p-value < 0.01; ### p-value < 0.001 compared to control. Abbreviations: Defa5,  $\alpha$ -defensin 5; Pancrypt, pancryptidin; Reg3g, regenerating islet-derived protein 3 gamma; for other abbreviations, see Figure 1.
